# Supplementary material for: Evolutionary transitions in the Asteraceae coincide with marked shifts in transposable element abundance
Source: PubMed Central journal article supplement (PMC4546089; doi:10.1186/s12864-015-1830-8), 2015-08-20

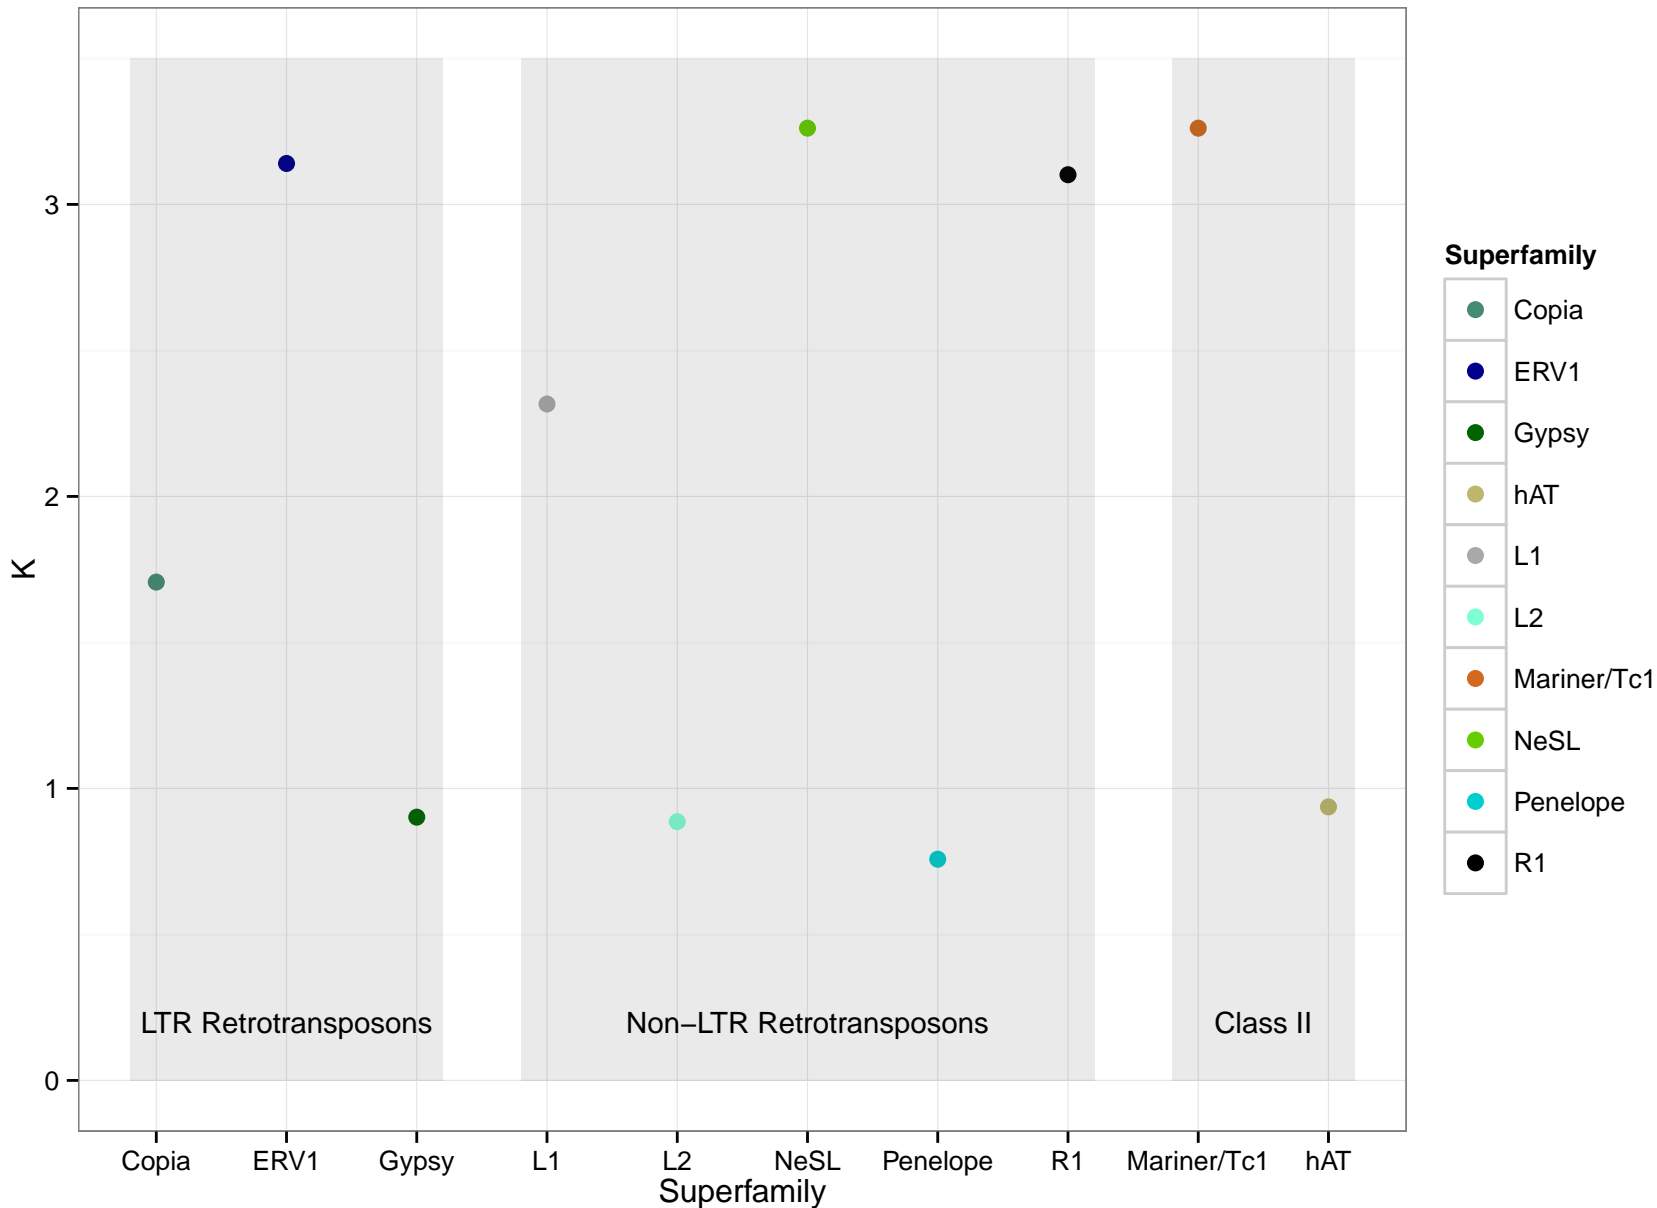

Supplement: 12864_2015_1830_MOESM1_ESM.pdf [file 12864_2015_1830_MOESM1_ESM.pdf]
