# Supplementary material for: Evolutionary transitions in the Asteraceae coincide with marked shifts in transposable element abundance
Source: PubMed Central journal article supplement (PMC4546089; doi:10.1186/s12864-015-1830-8), 2015-08-20
Supplement: 12864_2015_1830_MOESM2_ESM.pdf [file 12864_2015_1830_MOESM2_ESM.pdf]

Additional file 2. Phylogenetic signal for TE families in the Asteraceae. Shown are TE families exhibiting significant phylogenetic signal as compared to a Brownian motion model of evolution along the phylogenetic tree. For each TE family, we demonstrate the observed PIC (phylogenetic independent contrast) scores and significance value, along with the value of the random PIC scores.

| Order      | Superfamily | Family        | K           | PIC variance<br>(observed) | PIC variance<br>(random mean) | PIC variance<br><i>P-value</i> | PIC variance<br><i>Z-value</i> |
|------------|-------------|---------------|-------------|----------------------------|-------------------------------|--------------------------------|--------------------------------|
| LTR-RT     | Copia       | COPIA2_LC     | 3.257875889 | 5.14E+15                   | 3.67E+16                      | 0.039                          | -0.909125888                   |
| LTR-RT     | Copia       | COPIA2_MT     | 3.30773527  | 1.17E+16                   | 8.03E+16                      | 0.008                          | -0.878074852                   |
| LTR-RT     | Copia       | Copia15_VV    | 1.302072147 | 7.08E+13                   | 3.73E+14                      | 0.018                          | -2.10973762                    |
| LTR-RT     | Copia       | RLC_X         | 2.663159151 | 2.05E+17                   | 1.26E+18                      | 0.019                          | -0.89629912                    |
| LTR-RT     | Copia       | RLC_amov      | 0.710946644 | 2.98E+16                   | 7.74E+16                      | 0.037                          | -1.907217855                   |
| LTR-RT     | Copia       | RLC_jiliwu    | 0.520839198 | 1.07E+17                   | 3.06E+17                      | 0.018                          | -1.210112268                   |
| LTR-RT     | Copia       | RLC_ogaow     | 0.938232015 | 7.84E+15                   | 2.94E+16                      | 0.022                          | -2.438721569                   |
| LTR-RT     | Gypsy       | RLG_X         | 0.703019737 | 2.05E+17                   | 1.26E+18                      | 0.019                          | -0.89629912                    |
| LTR-RT     | Gypsy       | RLG_kefe      | 1.076403493 | 2.52E+16                   | 9.59E+16                      | 0.002                          | -2.767755405                   |
| LTR-RT     | Gypsy       | RLG_rewu      | 0.726242862 | 1.10E+17                   | 3.30E+17                      | 0.049                          | -2.032258579                   |
| LTR-RT     | Gypsy       | RLG_ryse      | 0.661494372 | 1.95E+15                   | 4.56E+15                      | 0.025                          | -1.933088881                   |
| LTR-RT     | Gypsy       | RLG_teda      | 1.507538406 | 1.25E+16                   | 7.55E+16                      | 0.006                          | -3.239986584                   |
| LTR-RT     | Gypsy       | RLG_tewuvu    | 0.850900791 | 7.53E+16                   | 3.50E+17                      | 0.011                          | -0.931314665                   |
| LTR-RT     | Gypsy       | DM176         | 3.261186883 | 3.34E+11                   | 2.18E+12                      | 0.039                          | -0.836834688                   |
| LTR-RT     | Gypsy       | GYPSY16_AG    | 3.261186883 | 3.34E+11                   | 2.18E+12                      | 0.036                          | -0.848736222                   |
| LTR-RT     | Gypsy       | Gypsy123_DR   | 3.239593367 | 1.34E+12                   | 9.04E+12                      | 0.0495                         | -0.881410277                   |
| LTR-RT     | Gypsy       | Gypsy1_SM     | 0.870785834 | 9.46E+11                   | 5.12E+12                      | 0.043                          | -1.03495498                    |
| LTR-RT     | ERV1        | ERV1_N6_DR    | 3.210894013 | 3.43E+14                   | 2.29E+15                      | 0.0335                         | -0.875115482                   |
| Non-LTR-RT | L1          | L1_11_DR      | 2.79895668  | 2.60E+13                   | 1.63E+14                      | 0.01                           | -1.042094132                   |
| Non-LTR-RT | L1          | L1_12_DR      | 3.261186883 | 3.34E+11                   | 2.41E+12                      | 0.0355                         | -0.928489469                   |
| Non-LTR-RT | L1          | L1_58_ACar    | 3.261186883 | 5.35E+12                   | 3.61E+13                      | 0.0395                         | -0.866658002                   |
| Non-LTR-RT | NeSL        | LIN4b_SM      | 3.261186883 | 3.34E+11                   | 2.15E+12                      | 0.0365                         | -0.832815617                   |
| Non-LTR-RT | CR1         | CR1_13_CQ     | 3.261186883 | 3.34E+11                   | 2.23E+1                       | 0.0385                         | -0.868749537                   |
| Non-LTR-RT | CR1         | CR1_58_HM     | 3.261186883 | 3.34E+11                   | 2.23E+12                      | 0.036                          | -0.872823223                   |
| Non-LTR-RT | CR1         | CR1_79_HM     | 3.261186883 | 2.14E+13                   | 1.46E+14                      | 0.0325                         | -0.870677374                   |
| Class II   | hAT         | P4_AG         | 3.261186883 | 3.34E+11                   | 2.30E+12                      | 0.0255                         | -0.892685921                   |
| Class II   | Mariner/Tc1 | SMAR15        | 3.261186883 | 3.01E+12                   | 1.99E+13                      | 0.0375                         | -0.854157409                   |
| Class II   | Mariner/Tc1 | ATHPOGON1     | 3.261186883 | 1.21E+14                   | 7.69E+14                      | 0.0355                         | -0.830930169                   |
| Class II   | Helitron    | Helitron3_PPa | 3.261186883 | 5.35E+12                   | 3.45E+13                      | 0.0405                         | -0.841984529                   |
