# Supplementary material for: Evolutionary transitions in the Asteraceae coincide with marked shifts in transposable element abundance
Source: PubMed Central journal article supplement (PMC4546089; doi:10.1186/s12864-015-1830-8), 2015-08-20
Supplement: 12864_2015_1830_MOESM3_ESM.pdf [file 12864_2015_1830_MOESM3_ESM.pdf]

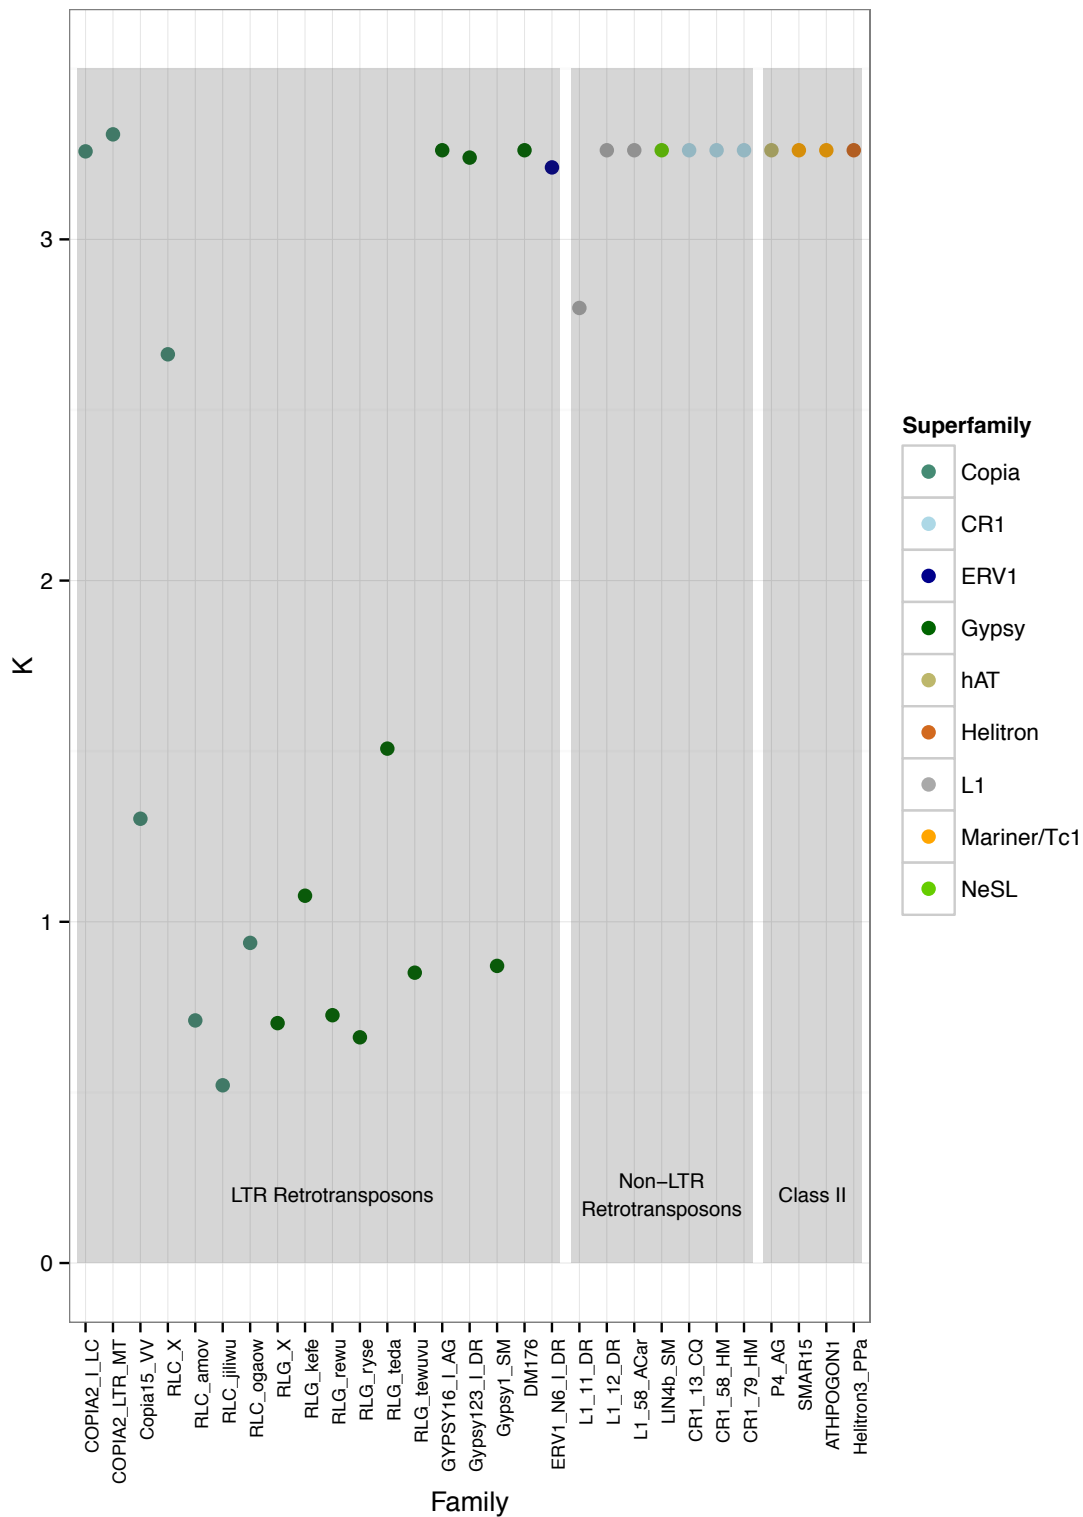

Additional file 3. TE families exhibiting significant phylogenetic signal. Along the x-axis are TE families in alphabetical order (divided by order, which is indicated by gray boxes) exhibiting significant phylogenetic signal (y-axis).
