# Supplementary material for: Evolutionary transitions in the Asteraceae coincide with marked shifts in transposable element abundance
Source: PubMed Central journal article supplement (PMC4546089; doi:10.1186/s12864-015-1830-8), 2015-08-20
Supplement: 12864_2015_1830_MOESM5_ESM.pdf [file 12864_2015_1830_MOESM5_ESM.pdf]

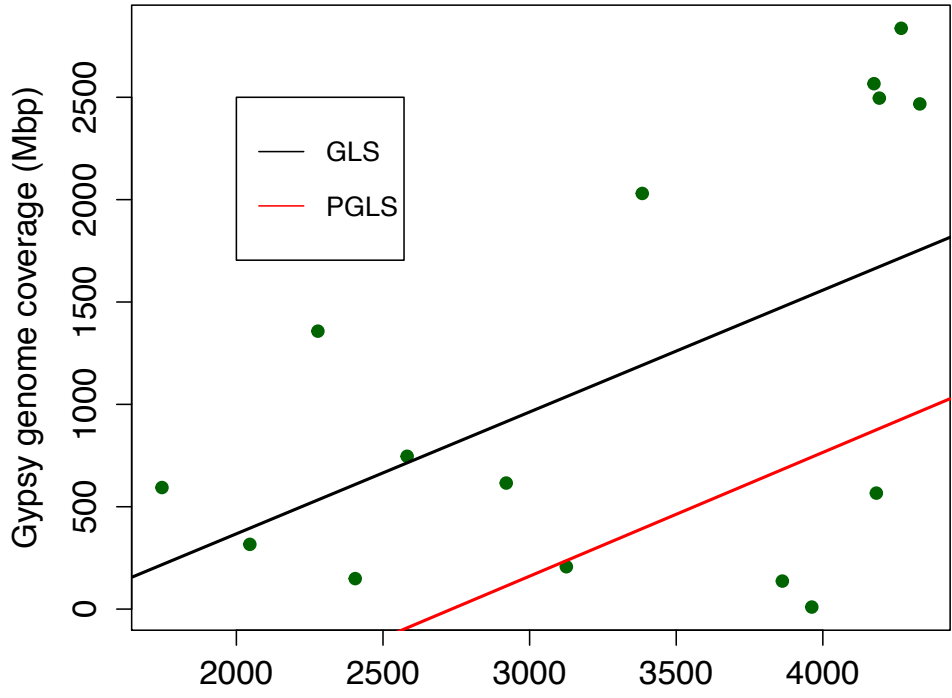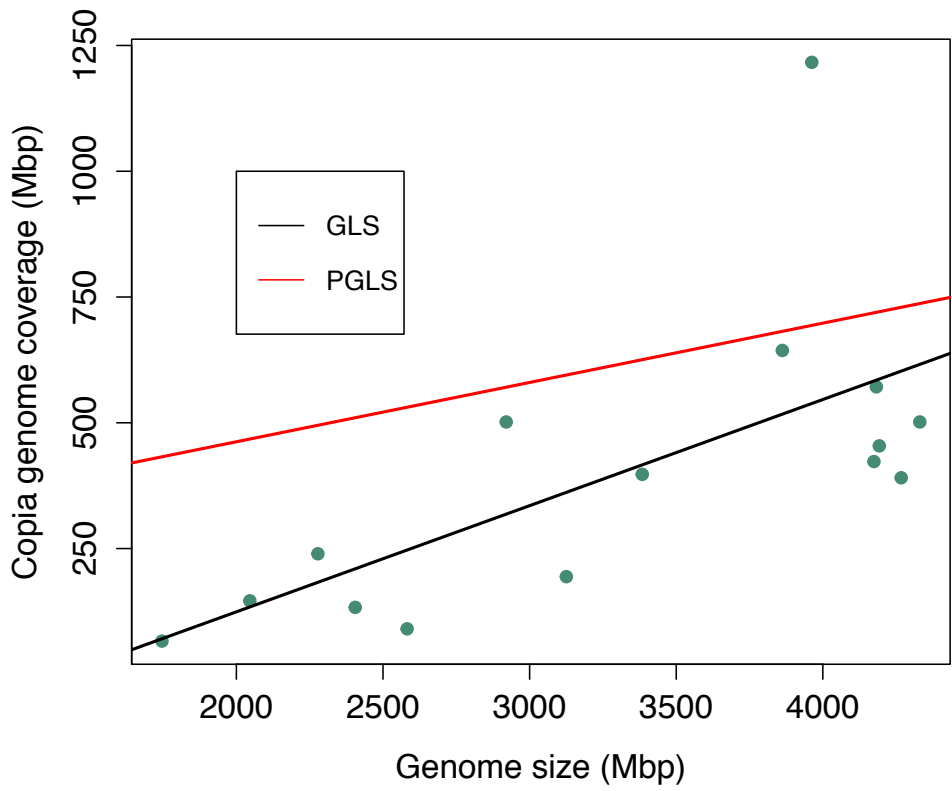

Additional file 5. GLS and PGLS tests for the evolution of *Gypsy* and *Copia* composition. The genomic composition (y-axis) of A) *Gypsy* and B) *Copia* TEs correlates strongly with genome size (x-axis) as shown by the GLS fit (black line), even when considering the phylogenetic relatedness of the species with a PGLS test (red line).
