# Supplementary material for: Evolutionary transitions in the Asteraceae coincide with marked shifts in transposable element abundance
Source: PubMed Central journal article supplement (PMC4546089; doi:10.1186/s12864-015-1830-8), 2015-08-20
Supplement: 12864_2015_1830_MOESM6_ESM.pdf [file 12864_2015_1830_MOESM6_ESM.pdf]

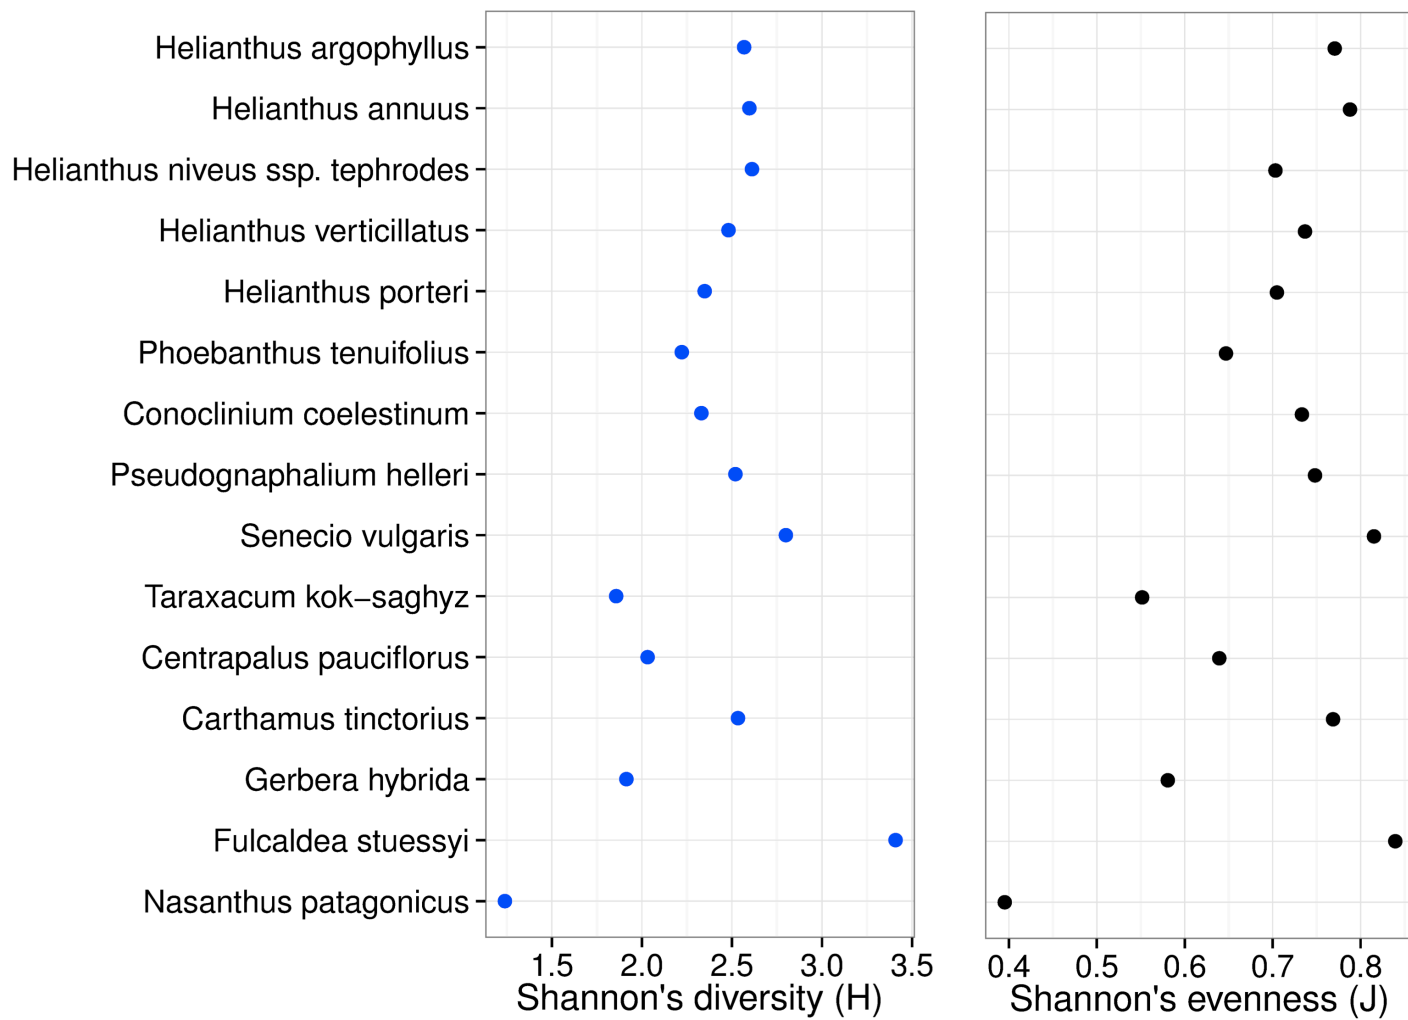

Additional file 6. Genome diversity statistics for TE families. The species shown along on the y-axis are in phylogenetic order from the outgroup (base of the y-axis) to the most derived lineages of the Asteraceae (top of the y-axis). The filled blue points are Shannon's diversity (H), and the black points show Shannon's evenness (J).
