# Supplementary material for: Evolutionary transitions in the Asteraceae coincide with marked shifts in transposable element abundance
Source: PubMed Central journal article supplement (PMC4546089; doi:10.1186/s12864-015-1830-8), 2015-08-20
Supplement: 12864_2015_1830_MOESM7_ESM.pdf [file 12864_2015_1830_MOESM7_ESM.pdf]

Additional file 7. Raw data statistics and genome size estimates. For each species in this study, we show the number of sequence reads generated and the corresponding genome coverage obtained from the genome size estimates (see Methods).

| Subfamily       | Tribe        | Genus                   | Species                      | Genome size <sup>1</sup> | Num. reads/ Genome X-coverage |
|-----------------|--------------|-------------------------|------------------------------|--------------------------|-------------------------------|
| Calyceraceae    | Calyceraceae | <i>Nastanthus</i>       | <i>patagonicus</i>           | 3962340892               | 22733114/0.58                 |
| Barnadesioideae | Barnadesieae | <i>Fulcaldea</i>        | <i>stuessyi</i>              | 4182557218               | 92343086/2.23                 |
| Mutisioideae    | Mutisieae    | <i>Gerbera</i>          | <i>hybrida</i>               | 3861919879               | 19128428/0.50                 |
| Carduoideae     | Cardueae     | <i>Carthamus</i>        | <i>tinctorius</i>            | 2405291468               | 18020913/0.76                 |
| Cichorioideae   | Cichorieae   | <i>Taraxacum</i>        | <i>kok-saghyz</i>            | 2582325776               | 21388100/0.84                 |
| Cichorioideae   | Vernonieae   | <i>Centrapalus</i>      | <i>pauciflorus</i>           | 3125365235               | 19627573/0.63                 |
| Cichorioideae   | Senecioneae  | <i>Senecio</i>          | <i>vulgaris</i>              | 2045909989               | 15732065/0.78                 |
| Cichorioideae   | Gnaphalieae  | <i>Pseudognaphalium</i> | <i>obtusifolium</i>          | 2920317131               | 13066952/0.45                 |
| Asteroideae     | Eupatorieae  | <i>Conoclinium</i>      | <i>coelestinum</i>           | 1746269472               | 20943700/1.21                 |
| Asteroideae     | Heliantheae  | <i>Phoebanthus</i>      | <i>tenuifolius</i>           | 4267295897               | 148630586/3.52                |
| Asteroideae     | Heliantheae  | <i>Helianthus</i>       | <i>porteri</i>               | 4330738740               | 18192388/0.42                 |
| Asteroideae     | Heliantheae  | <i>Helianthus</i>       | <i>verticillatus</i>         | 2278002736               | 18560744/0.82                 |
| Asteroideae     | Heliantheae  | <i>Helianthus</i>       | <i>niveus ssp. tephrodes</i> | 4192677026               | 23420666/0.56                 |
| Asteroideae     | Heliantheae  | <i>Helianthus</i>       | <i>argophyllus</i>           | 4174346891               | 25568942/0.62                 |
| Asteroideae     | Heliantheae  | <i>Helianthus</i>       | <i>annuus</i>                | 3384161947               | 22621880/0.68                 |

<sup>1</sup>base pairs
